# Supplementary material for: Al-Doped chitosan nonwoven in a novel adsorption reactor with a cylindrical sleeve for dye removal: performance and mechanism of action
Source: Royal Society of Chemistry journal article supplement (doi:10.1039/c6ra21369c), 2016-01-01
Supplement: c6ra21369c1.pdf [file c6ra21369c1.pdf]

**Supplementary material for**  
**Al-doping chitosan nonwoven in a novel adsorption reactor with**  
**sleeve cylinder for dye removal: Performance and mechanism**

Su Li<sup>a</sup>, Jing Yang<sup>a</sup>, Sadia Rashid<sup>a</sup>, Chensi Shen<sup>a, b, \*</sup>, Jianshe Liu<sup>a, b</sup>

<sup>a</sup> College of Environmental Science and Engineering, Donghua University, Shanghai  
201620, China.

<sup>b</sup> State Environmental Protection Engineering Center for Pollution Treatment and  
Control in Textile Industry, 201620, China.

---

\* Corresponding author:

Tel.: +86-021-67792548. Fax: +86-21-67792523.

E-mail address: shencs@dhu.edu.cn

## Texts

### 1 Text S1 Kinetic models

2 The kinetic models are given as follows:

3 The pseudo first-order kinetic model:

$$4 \quad \log(q_e - q_t) = \log q_e - \frac{K_1}{2.303} t \quad (1)$$

5 The pseudo second-order rate model:

$$6 \quad \frac{t}{q_t} = \frac{1}{h} + \frac{1}{q_e} t, \quad h = K_2 q_e^2 \quad (2)$$

7 where  $q_e$  and  $q_t$  are the amounts of dye adsorbed (mg/g) at equilibrium and at  
8 different intervals, respectively;  $K_1$  (1/min) and  $K_2$  (g/mg•min) are the pseudo-first-  
9 order and second-order rate constants; and  $h$  represents the initial adsorption rate  
10 (mg/g•min).

## 12 Text S2 Three isotherm equations

13 The Langmuir isotherm was originally proposed to describe the adsorption of gas  
14 molecules onto metal surfaces. The model assumes uniform energy of the adsorption  
15 onto the surface and no migration of the adsorbate in the plane of the surface. It is  
16 expressed as

$$17 \quad q_e = \frac{abC_e}{1+bC_e} \quad (3)$$

18 where  $q_e$  is the amount of dyes adsorbed at equilibrium (mg/g) and  $C_e$  is the  
19 adsorbate concentration at equilibrium in aqueous solution (mg/L). The Langmuir  
20 isotherm parameters are  $a$  and  $b$ . The capacity of the adsorbent can be evaluated by  $a$ ,  
21 and the parameter  $b$  includes various physical constants.

22 The Freundlich isotherm describes heterogeneous systems as the surfaces with  
23 nonenergetically equivalent sites. The equation can be written as follows:

$$24 \quad q_e = K_f C_e^{1/n} \quad (4)$$

25 where  $K_f$  is the Freundlich constant, which is indicative of the extent of  
26 adsorption, and  $1/n$  is the heterogeneity factor, an indicator of adsorption  
27 effectiveness. Another useful equation is the Langmuir-Freundlich isotherm, which is  
28 based on the generalized Langmuir and generalized exponential isotherms and is the  
29 most promising extension of the Langmuir and Freundlich isotherms. It is expressed  
30 as

$$31 \quad q_e = \frac{q_m (K_{lf} C_e)^v}{1 + (K_{lf} C_e)^v} \quad (5)$$

32 where  $q_m$  is the maximum adsorption (mg/g),  $K_{lf}$  is the Langmuir-Freundlich  
33 constant, and  $v$  is the Langmuir-Freundlich heterogeneity constant. The Langmuir-

34 Freundlich isotherm is essentially the Freundlich isotherm approaching a maximum at  
35 high concentrations.

36 **Text S3 Infrared spectroscopy analysis (FT-IR), Ultraviolet–Visible spectroscopy**  
37 **analysis (UV-Vis) and H-NMR analysis**

38 The Fourier-transform infrared (FT-IR) spectra of initial chitosan nonwoven and  
39 Al-doping chitosan nonwoven before and after adsorption are shown in **Fig. S3**,  
40 respectively. For pure chitosan nonwoven, a broad band at  $3429\text{ cm}^{-1}$  is attributed to  
41 the stretching of  $-\text{OH}$  and  $-\text{NH}_2$  groups. The N-H antisymmetric stretching vibration  
42 of primary amine is  $3357\text{ cm}^{-1}$  and  $3292\text{ cm}^{-1}$ . A band at  $2917\text{ cm}^{-1}$  corresponds to the  
43 stretching of C-H groups. The absorption band at  $1652\text{ cm}^{-1}$  and  $1591\text{ cm}^{-1}$  are  
44 assigned as amide I vibrations and  $-\text{NH}_2$  stretching vibration, respectively. The  
45 symmetric deformation of methyl groups are presented at  $1373\text{ cm}^{-1}$ . The fingerprint  
46 of chitosan is between  $1144$  and  $895\text{ cm}^{-1}$  corresponding to the polysaccharide  
47 skeleton (including the vibrations of the glycoside bonds, C–O and C–O–C stretching  
48 vibrations) <sup>1-4</sup>. FTIR spectrum of CSNW-AR73, Al-CSNW and Al-CSNW- AR73  
49 complex show much similar bands of chitosan nonwoven.

50 **Fig. S4** shows the UV-Vis absorption spectra of initial chitosan nonwoven and Al-  
51 doping chitosan nonwoven before and after adsorption. The dye maximum adsorption  
52 peak occurred at the  $510\text{ nm}$  wavelength. When initial chitosan nonwoven and Al-  
53 doping chitosan nonwoven after adsorption, there also appear the dye maximum  
54 adsorption peak at  $510\text{ nm}$ . It proves that the dyes combine with the adsorption  
55 materials. While the absorbance at  $510\text{ nm}$  of Al-doping chitosan nonwoven after

56 adsorption is lower than initial chitosan nonwoven after adsorption, which implies its  
57 much higher capacity.

58 The  $^1\text{H}$  NMR spectra of chitosan nonwoven and Al-doping chitosan nonwoven in  
59  $\text{CD}_3\text{COOD}/\text{D}_2\text{O}$  were shown in **Fig. S5**. According to the published studies <sup>5-7</sup>, a  
60 small peak about at 2.03 ppm assigned to the presence of  $-\text{CH}_3$  of the N-alkylated  
61 glucosamine (GlcN) residue. The singlet at 3.16 ppm was assigned to H2 of GlcN  
62 and N-alkylated GlcN, and the multiplet peaks from 3.6 to 3.9 ppm were attributed to  
63 H3, H4, H5, and H6 of GlcN and N-alkylated GlcN. There existed a peak at around  
64 4.8 ppm because of the presence of H1 of GlcN and N-alkylated GlcN. Although the  
65 Al species were supported on nonwoven successfully in loading from about 0.2267%  
66 by the modification processes according to the SEM-EDS result, no obvious  
67 difference between initial chitosan nonwoven and Al-doping chitosan nonwoven were  
68 observed. This result might be attributed to the low content of Al species on chitosan  
69 nonwoven, which is in agreement with the results of FTIR and UV-Vis spectra  
70 (**Figure S3 and S4**).

## Tables

**Table S1.** Parameters of kinetics study for AR73 adsorption onto Al-doping chitosan nonwoven

| Initial Concentration (mg/L) | Pseudo first-order equation |               |        | Pseudo second-order equation |                  |        |
|------------------------------|-----------------------------|---------------|--------|------------------------------|------------------|--------|
|                              | $q_e$ (mg/g)                | $K_1$ (1/min) | $R^2$  | $q_e$ (mg/g)                 | $K_2$ (g/mg•min) | $R^2$  |
| 20                           | 7.9646                      | 0.3205        | 0.9983 | 8.1526                       | 0.06183          | 0.9989 |
| 50                           | 20.0220                     | 0.1943        | 0.9957 | 20.9161                      | 0.01083          | 0.9960 |
| 100                          | 37.8800                     | 0.09737       | 0.9259 | 42.5532                      | 0.001804         | 0.9725 |
| 150                          | 54.1056                     | 0.01925       | 0.9234 | 61.4628                      | 0.001103         | 0.9619 |
| 200                          | 59.8149                     | 0.02142       | 0.9584 | 66.9344                      | 0.001586         | 0.9893 |

**Table S2.** Parameters of isotherm models for AR73 adsorption

| Adsorption Isotherm Model | Initial chitosan nonwoven                                                    |        | Al-doping chitosan nonwoven                                                 |         |
|---------------------------|------------------------------------------------------------------------------|--------|-----------------------------------------------------------------------------|---------|
|                           | Parameters                                                                   | $R^2$  | Parameters                                                                  | $R^2$   |
| Langmuir                  | $a = 78.37 \text{ mg/g}$<br>$b = 0.13529 \text{ L/g}$                        | 0.9414 | $a = 144.67 \text{ mg/g}$<br>$b = 1.2168 \text{ L/g}$                       | 0.85794 |
| Freundlich                | $K_f = 25.82$<br>$\text{mg}^{1-1/n}\text{L}^{1/n}/\text{g}$<br>$n = 5.86447$ | 0.9216 | $K_f = 61.07$<br>$\text{mg}^{1-1/n}\text{L}^{1/n}/\text{g}$<br>$n = 6.9518$ | 0.95076 |
| Langmuir-Freundlich       | $q_m = 88.43\text{mg/g}$<br>$K_{lf} = 0.08682$<br>$v = 0.51724$              | 0.9774 | $q_m = 260.03\text{mg/g}$<br>$K_{lf} = 0.00725$<br>$v = 0.23468$            | 0.95251 |

## Figures

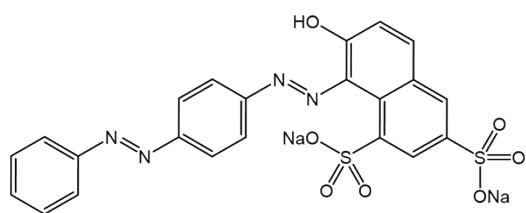

**C. I. Acid Red 73**

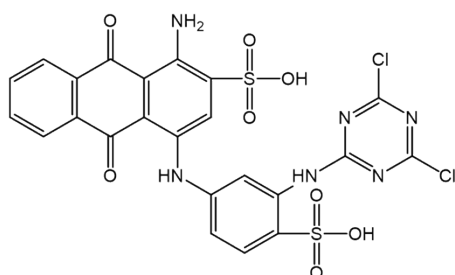

**C. I. Reactive Blue 19**

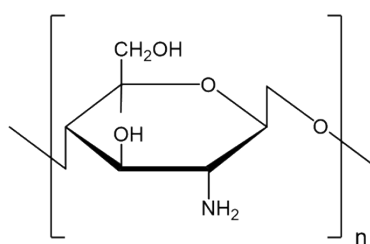

**Chitosan**

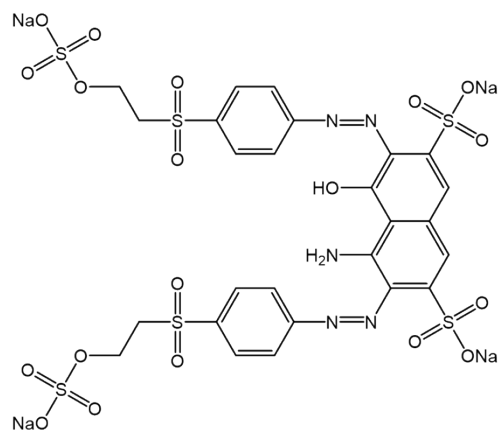

**C. I. Reactive Black 5**

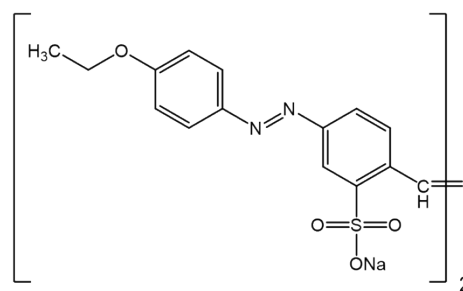

**C. I. Direct Yellow 12**

**Figure S1.** The chemical structures of dyes and chitosan.



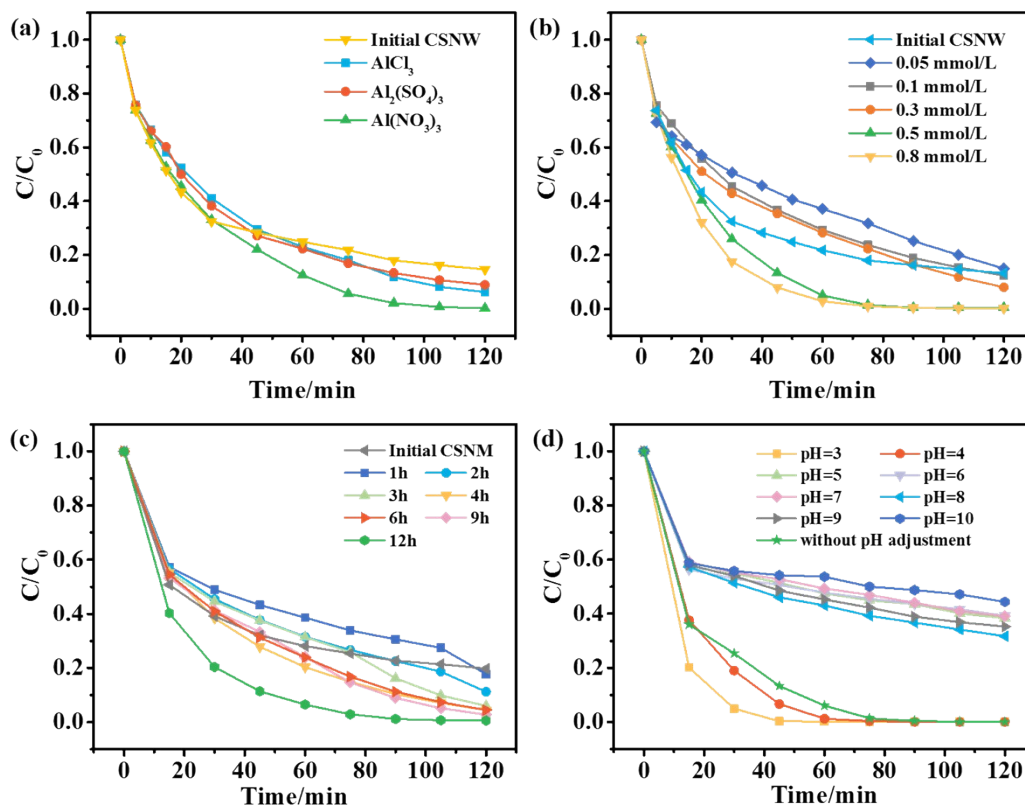

**Figure S2.** Effect of (a) aluminum source, (b) content of  $\text{Al}^{3+}$ , (c) modification time and (d) modification pH on AR73 removal by Al-doping chitosan nonwoven (initial concentration 100 mg/L, 2 L, adsorbent 5 g).

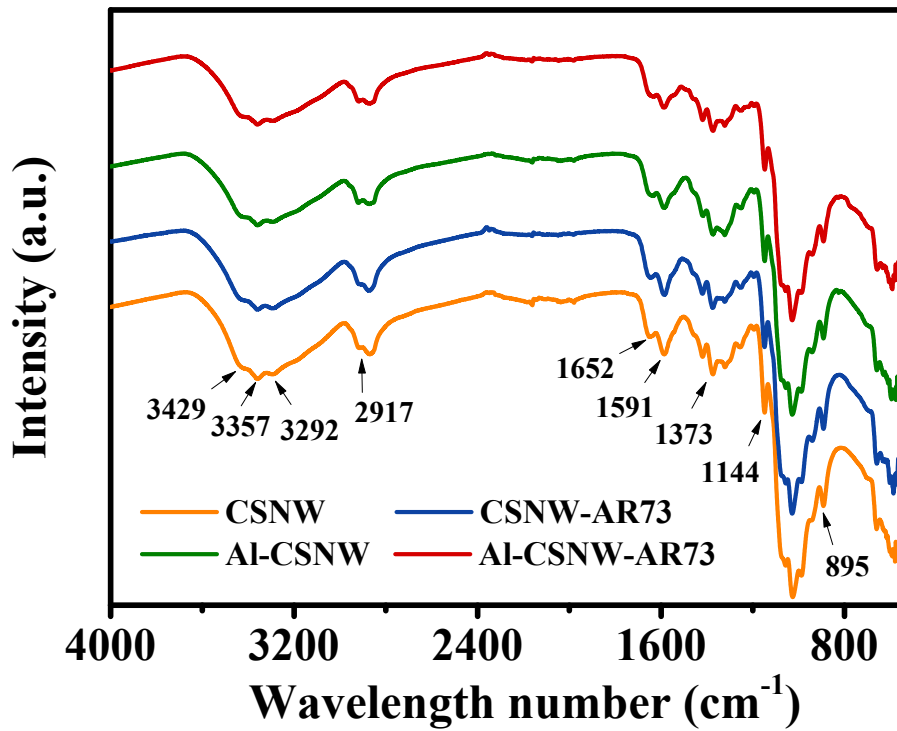

**Figure. S3** FTIR spectra of initial chitosan nonwoven (CSNW), initial chitosan nonwoven after adsorption (CSNW-AR73), Al-doping chitosan nonwoven (Al-CSNW), and Al-doping chitosan nonwoven after adsorption (Al-CSNW-AR73).

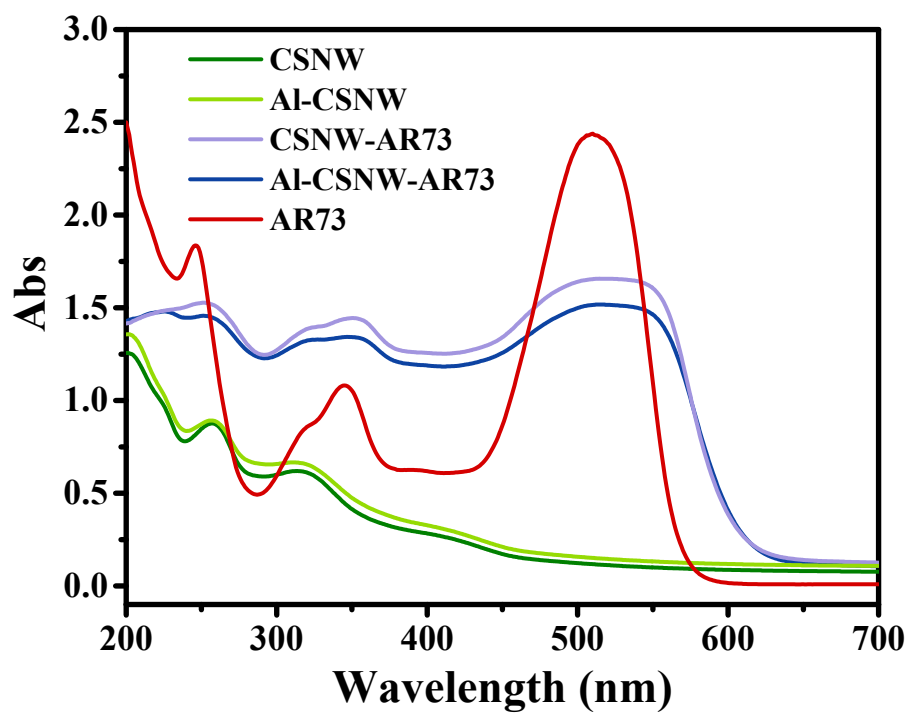

71 **Figure. S4** UV-vis diffuse reflection spectra of C. I. Acid Red 73 (AR73), initial  
72 chitosan nonwoven (CSNW), initial chitosan nonwoven after adsorption (CSNW-  
73 AR73), Al-doping chitosan nonwoven (Al-CSNW) and Al-doping chitosan nonwoven  
74 after adsorption (Al-CSNW-AR73).

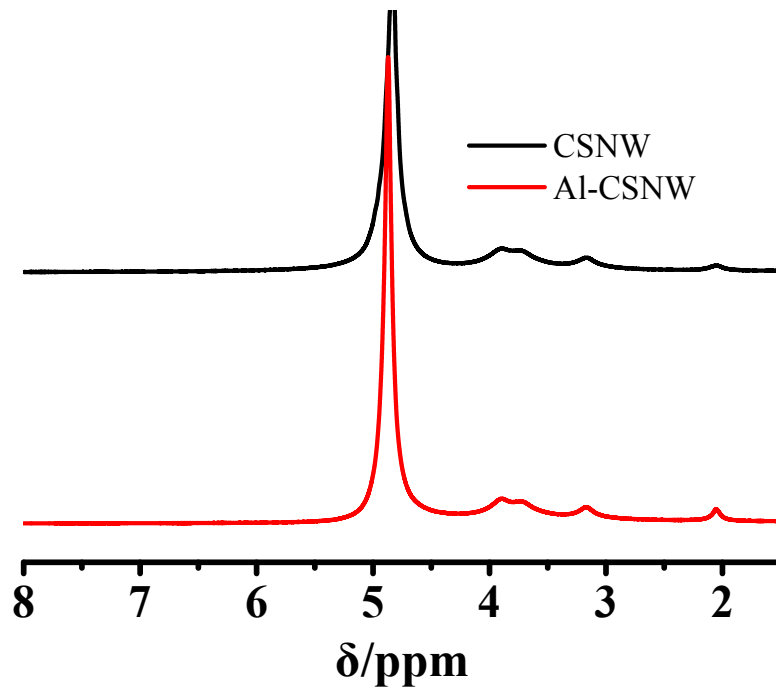

75

76 **Figure. S5**  $^1\text{H}$  NMR spectra of chitosan nonwoven (CSNW) and Al-doping chitosan

77

nonwoven (Al-CSNW) in  $\text{D}_3\text{CCOOD}/\text{D}_2\text{O}$

- 80 1. G. Z. Kyzas, P. I. Siafaka, E. G. Pavlidou, K. J. Chrissafis and D. N. Bikiaris,  
81 *Chem. Eng. J.*, 2015, **259**, 438-448.
- 82 2. R. Tang, Y. Zhang, Y. Zhang and Z. Yu, *Carbohydr. Polym.*, 2016, **139**, 191-  
83 196.
- 84 3. G. L. Dotto and L. A. A. Pinto, *J. Hazard. Mater.*, 2011, **187**, 164-170.
- 85 4. N. Sakkayawong, P. Thiravetyan and W. Nakbanpote, *J. Colloid Interface*  
86 *Sci.*, 2005, **286**, 36-42.
- 87 5. Y. Zhou, H. Yang, X. Liu, J. Mao, S. Gu and W. Xu, *Int. J. Biol. Macromol.*,  
88 2013, **52**, 327-332.
- 89 6. Q. Li, D. Yang, G. Ma, Q. Xu, X. Chen, F. Lu and J. Nie, *Int. J. Biol.*  
90 *Macromol.*, 2009, **44**, 121-127.
- 91 7. Y. Zhao, L. Ma, R. Zeng, M. Tu and J. Zhao, *Carbohydr. Polym.*, 2016, **151**,  
92 237-244.
